# Supplementary material for: Exploration of a high-efficiency and low-cost technique for maximizing the glucoamylase production from food waste
Source: Royal Society of Chemistry journal article supplement (doi:10.1039/c9ra04530a), 2019-01-01
Supplement: c9ra04530a1.pdf [file c9ra04530a1.pdf]

## Supplementary Material

**Title:** Exploring a high-efficiency and low-cost technique for maximizing glucoamylase production from food waste

Meng Shujuan,<sup>ab</sup> Yin Yao,<sup>b</sup> Yu Liu <sup>\*bc</sup>

**Table S1** Compositions of substrates used in this study (based on dry weight)

|                  | Starch (mg/g) | Protein (mg/g) | Lipid (mg/g) | Ash (mg/g) |
|------------------|---------------|----------------|--------------|------------|
| Mixed food waste | 453.8 ± 47.2  | 240.1 ± 15.6   | 143.2 ± 8.7  | 34.9 ± 3.1 |
| Rice waste       | 823.2 ± 59.3  | 67.8 ± 6.1     | 8.7 ± 0.5    | 7.1 ± 0.3  |
| Cake waste       | 566.8 ± 38.9  | 127.8 ± 8.7    | 157.2 ± 5.6  | 23.6 ± 1.5 |

**Table S2** Central composite design with experimental and predicted responses of GA activities.

| Run | Fermentation time (X <sub>1</sub> , day) | Amount of inoculum (X <sub>2</sub> , mL) | Fermentation temperature (X <sub>3</sub> , °C) | GA activity (U/g) |           |
|-----|------------------------------------------|------------------------------------------|------------------------------------------------|-------------------|-----------|
|     |                                          |                                          |                                                | Experimental      | Predicted |
| 1   | 8                                        | 2                                        | 30                                             | 155.62            | 159.56    |
| 2   | 6                                        | 1.5                                      | 35                                             | 169.50            | 163.81    |
| 3   | 6                                        | 1.5                                      | 45                                             | 81.24             | 74.37     |
| 4   | 4                                        | 2                                        | 30                                             | 79.06             | 83.25     |
| 5   | 6                                        | 1.5                                      | 25                                             | 140.01            | 136.22    |
| 6   | 6                                        | 1.5                                      | 35                                             | 161.20            | 163.81    |
| 7   | 6                                        | 1.5                                      | 35                                             | 165.35            | 163.81    |
| 8   | 6                                        | 0.5                                      | 35                                             | 78.87             | 72.56     |
| 9   | 10                                       | 1.5                                      | 35                                             | 149.99            | 144.87    |
| 10  | 4                                        | 1                                        | 40                                             | 79.42             | 86.14     |
| 11  | 6                                        | 1.5                                      | 35                                             | 163.98            | 163.81    |
| 12  | 4                                        | 1                                        | 30                                             | 95.16             | 100.30    |
| 13  | 6                                        | 2.5                                      | 35                                             | 65.33             | 60.99     |
| 14  | 2                                        | 1.5                                      | 35                                             | 53.87             | 48.32     |
| 15  | 6                                        | 1.5                                      | 35                                             | 164.93            | 163.81    |
| 16  | 8                                        | 2                                        | 40                                             | 106.34            | 111.86    |
| 17  | 4                                        | 2                                        | 40                                             | 60.54             | 66.24     |
| 18  | 8                                        | 1                                        | 30                                             | 146.26            | 151.22    |
| 19  | 6                                        | 1.5                                      | 35                                             | 168.58            | 163.81    |
| 20  | 8                                        | 1                                        | 40                                             | 99.92             | 106.39    |

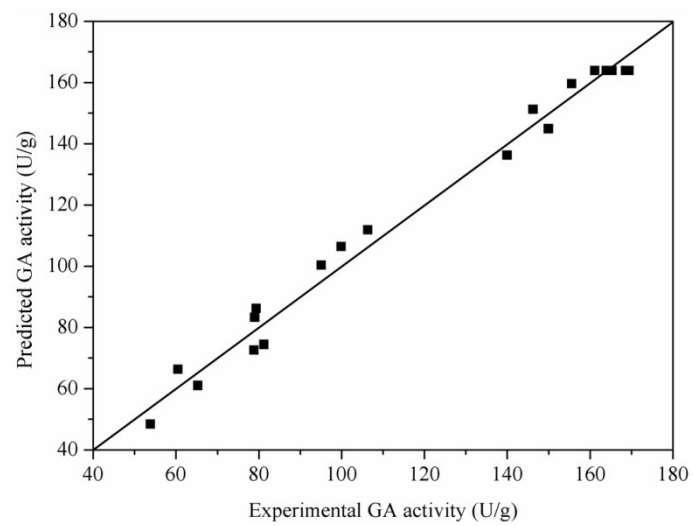

**Fig. S1** The distribution of experimental vs. predicted values of GA yield.
